# Supplementary material for: Technical Note: Simulation of detailed aerosol chemistry on the global scale using MECCA-AERO
Source: Copernicus journal article supplement (doi:10.5194/acp-7-2973-2007), 2007-06-12
Supplement: Supplementary file 1 [file acp-7-2973-2007-supplement.zip]

# The Chemical Equations of MECCA-AERO

Astrid Kerkweg & Rolf Sander

`akerkweg@mpch-mainz.mpg.de`, `sander@mpch-mainz.mpg.de`

Air Chemistry Department, Max-Planck Institute of Chemistry, PO Box 3060,  
55020 Mainz, Germany

Number of reactions in selected mechanism:

Aqueous phase (Annn): 132

Henry (Hnnn): 77

Equilibria (EQnn): 50

The mechanism was generated on October 24, 2006.

Table 1: Henry's law coefficients

| substance                      | $\frac{k_H^\ominus}{\text{M/atm}}$   | $\frac{-\Delta_{\text{soln}}H/R}{\text{K}}$ | reference                       |
|--------------------------------|--------------------------------------|---------------------------------------------|---------------------------------|
| O <sub>2</sub>                 | $1.3 \times 10^{-3}$                 | 1500.                                       | Wilhelm et al. (1977)           |
| O <sub>3</sub>                 | $1.2 \times 10^{-2}$                 | 2560.                                       | Chameides (1984)                |
| OH                             | $3.0 \times 10^1$                    | 4300.                                       | Hanson et al. (1992)            |
| HO <sub>2</sub>                | $3.9 \times 10^3$                    | 5900.                                       | Hanson et al. (1992)            |
| H <sub>2</sub> O <sub>2</sub>  | $1. \times 10^5$                     | 6338.                                       | Lind and Kok (1994)             |
| NH <sub>3</sub>                | 58.                                  | 4085.                                       | Chameides (1984)                |
| NO <sub>2</sub>                | $7.0 \times 10^{-3}$                 | 2500.                                       | Lee and Schwartz (1981)*        |
| NO <sub>3</sub>                | 2.                                   | 2000.                                       | Thomas et al. (1993)            |
| HONO                           | $4.9 \times 10^1$                    | 4780.                                       | Schwartz and White (1981)       |
| HNO <sub>3</sub>               | $2.45 \times 10^6 / 1.5 \times 10^1$ | 8694.                                       | Brimblecombe and Clegg (1989)*  |
| HNO <sub>4</sub>               | $1.2 \times 10^4$                    | 6900.                                       | Régimbal and Mozurkewich (1997) |
| CH <sub>3</sub> O <sub>2</sub> | 6.                                   | 5600.                                       | Jacob (1986)*                   |
| CH <sub>3</sub> OOH            | $3.0 \times 10^2$                    | 5322.                                       | Lind and Kok (1994)             |
| HCHO                           | $7.0 \times 10^3$                    | 6425.                                       | Chameides (1984)                |
| HCOOH                          | $3.7 \times 10^3$                    | 5700.                                       | Chameides (1984)                |
| CO <sub>2</sub>                | $3.1 \times 10^{-2}$                 | 2423.                                       | Chameides (1984)                |
| Cl <sub>2</sub>                | $9.2 \times 10^{-2}$                 | 2081.                                       | Bartlett and Margerum (1999)    |
| HCl                            | 2./1.7                               | 9001.                                       | Brimblecombe and Clegg (1989)   |
| HOCl                           | $6.7 \times 10^2$                    | 5862.                                       | Huthwelker et al. (1995)        |
| Br <sub>2</sub>                | $7.7 \times 10^{-1}$                 | 3837.                                       | Bartlett and Margerum (1999)    |
| HBr                            | 1.3                                  | 10239.                                      | Brimblecombe and Clegg (1989)*  |
| HOBr                           | $9.3 \times 10^1$                    | 5862.                                       | Vogt et al. (1996)*             |
| BrCl                           | $9.4 \times 10^{-1}$                 | 5600.                                       | Bartlett and Margerum (1999)    |
| I <sub>2</sub>                 | 3.                                   | 4431.                                       | Palmer et al. (1985)            |
| IO                             | $4.5 \times 10^2$                    | 5862.                                       | see note                        |
| HOI                            | $4.5 \times 10^2$                    | 5862.                                       | Chatfield and Crutzen (1990)*   |
| ICl                            | $1.1 \times 10^2$                    | 5600.                                       | see note                        |
| IBr                            | $2.4 \times 10^1$                    | 5600.                                       | see note                        |
| SO <sub>2</sub>                | 1.2                                  | 3120.                                       | Chameides (1984)                |
| H <sub>2</sub> SO <sub>4</sub> | $1. \times 10^{11}$                  | 0.                                          | see note                        |
| DMSO                           | $5. \times 10^4$                     | 6425.                                       | De Bruyn et al. (1994)*         |

\*Notes:

The temperature dependence of the Henry constants is:

$$K_{\text{H}} = K_{\text{H}}^{\ominus} \times \exp\left(\frac{-\Delta_{\text{soln}}H}{R} \left(\frac{1}{T} - \frac{1}{T^{\ominus}}\right)\right)$$

NO<sub>2</sub>: The temperature dependence is from Chameides (1984).

HNO<sub>3</sub>: Calculated using the acidity constant from

Davis and de Bruin (1964).

CH<sub>3</sub>O<sub>2</sub>: This value was estimated by Jacob (1986).

HBr: Calculated using the acidity constant from Lax (1969).

HOBr: This value was estimated by Vogt et al. (1996).

IO: Assumed to be the same as  $K_{\text{H}}(\text{HOI})$ .

HOI: Lower limit.

ICl: Calculated using thermodynamic data from Wagman et al. (1982).

IBr: Calculated using thermodynamic data from Wagman et al. (1982).

H<sub>2</sub>SO<sub>4</sub>: To account for the very high Henry's law coefficient of H<sub>2</sub>SO<sub>4</sub>, a very high value was chosen arbitrarily.

DMSO: Lower limit cited from another reference.

Table 2: Accommodation coefficients

| substance                      | $\alpha^\ominus$ | $\frac{-\Delta_{\text{obs}}H/R}{K}$ | reference                     |
|--------------------------------|------------------|-------------------------------------|-------------------------------|
| O <sub>2</sub>                 | 0.01             | 2000.                               | see note                      |
| O <sub>3</sub>                 | 0.002            | 0.                                  | DeMore et al. (1997)*         |
| OH                             | 0.01             | 0.                                  | Takami et al. (1998)*         |
| HO <sub>2</sub>                | 0.2              | 0.                                  | DeMore et al. (1997)*         |
| H <sub>2</sub> O <sub>2</sub>  | 0.077            | 3127.                               | Worsnop et al. (1989)         |
| NH <sub>3</sub>                | 0.06             | 0.                                  | DeMore et al. (1997)*         |
| NO <sub>2</sub>                | 0.0015           | 0.                                  | Ponche et al. (1993)*         |
| NO <sub>3</sub>                | 0.04             | 0.                                  | Rudich et al. (1996)*         |
| HONO                           | 0.04             | 0.                                  | DeMore et al. (1997)*         |
| HNO <sub>3</sub>               | 0.5              | 0.                                  | Abbatt and Waschewsky (1998)* |
| HNO <sub>4</sub>               | 0.1              | 0.                                  | DeMore et al. (1997)*         |
| CH <sub>3</sub> O <sub>2</sub> | 0.01             | 2000.                               | see note                      |
| CH <sub>3</sub> OOH            | 0.0046           | 3273.                               | Magi et al. (1997)            |
| HCHO                           | 0.04             | 0.                                  | DeMore et al. (1997)*         |
| HCOOH                          | 0.014            | 3978.                               | DeMore et al. (1997)          |
| CO <sub>2</sub>                | 0.01             | 2000.                               | see note                      |
| Cl <sub>2</sub>                | 0.038            | 6546.                               | Hu et al. (1995)              |
| HCl                            | 0.074            | 3072.                               | Schweitzer et al. (2000)*     |
| HOCl                           | 0.5              | 0.                                  | see note                      |
| Br <sub>2</sub>                | 0.038            | 6546.                               | Hu et al. (1995)              |
| HBr                            | 0.032            | 3940.                               | Schweitzer et al. (2000)*     |
| HOBr                           | 0.5              | 0.                                  | Abbatt and Waschewsky (1998)* |
| BrCl                           | 0.38             | 6546.                               | see note                      |
| I <sub>2</sub>                 | 0.01             | 2000.                               | see note                      |
| IO                             | 0.5              | 2000.                               | see note                      |
| HOI                            | 0.5              | 0.                                  | see note                      |
| ICl                            | 0.01             | 2000.                               | see note                      |
| IBr                            | 0.01             | 2000.                               | see note                      |
| SO <sub>2</sub>                | 0.11             | 0.                                  | DeMore et al. (1997)          |
| H <sub>2</sub> SO <sub>4</sub> | 0.65             | 0.                                  | Pöschl et al. (1998)*         |
| DMSO                           | 0.048            | 2578.                               | De Bruyn et al. (1994)        |

\*Notes:

The temperature dependence of the accommodation coefficients is given by (Jayne et al., 1991):

$$\begin{aligned}\frac{\alpha}{1-\alpha} &= \exp\left(\frac{-\Delta_{\text{obs}}G}{RT}\right) \\ &= \exp\left(\frac{-\Delta_{\text{obs}}H}{RT} + \frac{\Delta_{\text{obs}}S}{R}\right)\end{aligned}$$

It can be rearranged to:

$$\ln\left(\frac{\alpha}{1-\alpha}\right) = \frac{-\Delta_{\text{obs}}H}{R} \times \frac{1}{T} + \frac{-\Delta_{\text{obs}}S}{R}$$

and further:

$$d \ln\left(\frac{\alpha}{1-\alpha}\right) \bigg/ d\left(\frac{1}{T}\right) = \frac{-\Delta_{\text{obs}}H}{R}$$

If no data were available, a value of  $\alpha = 0.01$ ,  $\alpha = 0.1$ , or  $\alpha = 0.5$ , and a temperature dependence of  $-\Delta_{\text{obs}}H/R = 2000 \text{ K}$  has been assumed.

O<sub>2</sub>: Estimate.

O<sub>3</sub>: Value measured at 292 K.

OH: Value measured at 293 K.

HO<sub>2</sub>: Value for aqueous salts at 293 K.

NH<sub>3</sub>: Value measured at 295 K.

NO<sub>2</sub>: Value measured at 298 K.

NO<sub>3</sub>: Value is a lower limit, measured at 273 K.

HONO: Value measured between 247 and 297 K.

HNO<sub>3</sub>: Value measured at room temperature. Abbatt and Waschewsky (1998) say  $\gamma > 0.2$ . Here  $\alpha = 0.5$  is used.

HNO<sub>4</sub>: Value measured at 200 K for water ice.

CH<sub>3</sub>O<sub>2</sub>: Estimate.

HCHO: Value measured between 260 and 270 K.

CO<sub>2</sub>: Estimate.

HCl: Temperature dependence derived from published data at 2 different temperatures

HOCl: Assumed to be the same as  $\alpha(\text{HOBr})$ .

HBr: Temperature dependence derived from published data at 2 different temperatures

HOBr: Value measured at room temperature. Abbatt and Waschewsky (1998) say  $\gamma > 0.2$ . Here  $\alpha = 0.5$  is used.

BrCl: Assumed to be the same as  $\alpha(\text{Cl}_2)$ .

I<sub>2</sub>: Estimate.

IO: Estimate.

HOI: Assumed to be the same as  $\alpha(\text{HOBr})$ .

ICl: Estimate.

IBr: Estimate.

H<sub>2</sub>SO<sub>4</sub>: Value measured at 303 K.

Table 3: Henry's law equilibria

| #      | labels          | reaction                                   | rate coefficient                                     | reference                                   |
|--------|-----------------|--------------------------------------------|------------------------------------------------------|---------------------------------------------|
| H1000f | TrAa01Sc        | $O_2 \rightarrow O_2(aq)$                  | $k_{\text{exf}}(01, \text{KPP\_O2})$                 | see note                                    |
| H1000b | TrAa01Sc        | $O_2(aq) \rightarrow O_2$                  | $k_{\text{exb}}(01, \text{KPP\_O2})$                 | see note                                    |
| H1001f | TrAa01MblScScm  | $O_3 \rightarrow O_3(aq)$                  | $k_{\text{exf}}(01, \text{KPP\_O3})$                 | see note                                    |
| H1001b | TrAa01MblScScm  | $O_3(aq) \rightarrow O_3$                  | $k_{\text{exb}}(01, \text{KPP\_O3})$                 | see note                                    |
| H2100f | TrAa01Sc        | $OH \rightarrow OH(aq)$                    | $k_{\text{exf}}(01, \text{KPP\_OH})$                 | see note                                    |
| H2100b | TrAa01Sc        | $OH(aq) \rightarrow OH$                    | $k_{\text{exb}}(01, \text{KPP\_OH})$                 | see note                                    |
| H2101f | TrAa01Sc        | $HO_2 \rightarrow HO_2(aq)$                | $k_{\text{exf}}(01, \text{KPP\_HO2})$                | see note                                    |
| H2101b | TrAa01Sc        | $HO_2(aq) \rightarrow HO_2$                | $k_{\text{exb}}(01, \text{KPP\_HO2})$                | see note                                    |
| H2102f | TrAa01MblScScm  | $H_2O_2 \rightarrow H_2O_2(aq)$            | $k_{\text{exf}}(01, \text{KPP\_H2O2})$               | see note                                    |
| H2102b | TrAa01MblScScm  | $H_2O_2(aq) \rightarrow H_2O_2$            | $k_{\text{exb}}(01, \text{KPP\_H2O2})$               | see note                                    |
| H3101f | TrAa01NSc       | $NO_2 \rightarrow NO_2(aq)$                | $k_{\text{exf}}(01, \text{KPP\_NO2})$                | see note                                    |
| H3101b | TrAa01NSc       | $NO_2(aq) \rightarrow NO_2$                | $k_{\text{exb}}(01, \text{KPP\_NO2})$                | see note                                    |
| H3102f | TrAa01NSc       | $NO_3 \rightarrow NO_3(aq)$                | $k_{\text{exf}}(01, \text{KPP\_NO3})$                | see note                                    |
| H3102b | TrAa01NSc       | $NO_3(aq) \rightarrow NO_3$                | $k_{\text{exb}}(01, \text{KPP\_NO3})$                | see note                                    |
| H3200f | TrAa01NMblScScm | $NH_3 \rightarrow NH_3(aq)$                | $k_{\text{exf}}(01, \text{KPP\_NH3})$                | see note                                    |
| H3200b | TrAa01NMblScScm | $NH_3(aq) \rightarrow NH_3$                | $k_{\text{exb}}(01, \text{KPP\_NH3})$                | see note                                    |
| H3201  | TrAa01MblNScScm | $N_2O_5 \rightarrow HNO_3(aq) + HNO_3(aq)$ | $k_{\text{exf\_N2O5}}(01) * C(\text{KPP\_H2O\_a01})$ | Behnke et al. (1994), Behnke et al. (1997)* |
| H3202f | TrAa01NSc       | $HONO \rightarrow HONO(aq)$                | $k_{\text{exf}}(01, \text{KPP\_HONO})$               | see note                                    |
| H3202b | TrAa01NSc       | $HONO(aq) \rightarrow HONO$                | $k_{\text{exb}}(01, \text{KPP\_HONO})$               | see note                                    |
| H3203f | TrAa01MblNScScm | $HNO_3 \rightarrow HNO_3(aq)$              | $k_{\text{exf}}(01, \text{KPP\_HNO3})$               | see note                                    |
| H3203b | TrAa01MblNScScm | $HNO_3(aq) \rightarrow HNO_3$              | $k_{\text{exb}}(01, \text{KPP\_HNO3})$               | see note                                    |
| H3204f | TrAa01NSc       | $HNO_4 \rightarrow HNO_4(aq)$              | $k_{\text{exf}}(01, \text{KPP\_HNO4})$               | see note                                    |
| H3204b | TrAa01NSc       | $HNO_4(aq) \rightarrow HNO_4$              | $k_{\text{exb}}(01, \text{KPP\_HNO4})$               | see note                                    |
| H4100f | TrAa01MblScScm  | $CO_2 \rightarrow CO_2(aq)$                | $k_{\text{exf}}(01, \text{KPP\_CO2})$                | see note                                    |
| H4100b | TrAa01MblScScm  | $CO_2(aq) \rightarrow CO_2$                | $k_{\text{exb}}(01, \text{KPP\_CO2})$                | see note                                    |
| H4101f | TrAa01ScScm     | $HCHO \rightarrow HCHO(aq)$                | $k_{\text{exf}}(01, \text{KPP\_HCHO})$               | see note                                    |
| H4101b | TrAa01ScScm     | $HCHO(aq) \rightarrow HCHO$                | $k_{\text{exb}}(01, \text{KPP\_HCHO})$               | see note                                    |
| H4102f | TrAa01Sc        | $CH_3O_2 \rightarrow CH_3OO(aq)$           | $k_{\text{exf}}(01, \text{KPP\_CH3O2})$              | see note                                    |
| H4102b | TrAa01Sc        | $CH_3OO(aq) \rightarrow CH_3O_2$           | $k_{\text{exb}}(01, \text{KPP\_CH3O2})$              | see note                                    |
| H4103f | TrAa01ScScm     | $HCOOH \rightarrow HCOOH(aq)$              | $k_{\text{exf}}(01, \text{KPP\_HCOOH})$              | see note                                    |
| H4103b | TrAa01ScScm     | $HCOOH(aq) \rightarrow HCOOH$              | $k_{\text{exb}}(01, \text{KPP\_HCOOH})$              | see note                                    |
| H4104f | TrAa01ScScm     | $CH_3OOH \rightarrow CH_3OOH(aq)$          | $k_{\text{exf}}(01, \text{KPP\_CH3OOH})$             | see note                                    |
| H4104b | TrAa01ScScm     | $CH_3OOH(aq) \rightarrow CH_3OOH$          | $k_{\text{exb}}(01, \text{KPP\_CH3OOH})$             | see note                                    |

Table 3: Henry's law equilibria

| #      | labels           | reaction                                                                                                    | rate coefficient                                      | reference                                   |
|--------|------------------|-------------------------------------------------------------------------------------------------------------|-------------------------------------------------------|---------------------------------------------|
| H6000f | TrAa01ClMblSc    | $\text{Cl}_2 \rightarrow \text{Cl}_2(\text{aq})$                                                            | $k_{\text{exf}}(01, \text{KPP\_Cl2})$                 | see note                                    |
| H6000b | TrAa01ClMblSc    | $\text{Cl}_2(\text{aq}) \rightarrow \text{Cl}_2$                                                            | $k_{\text{exb}}(01, \text{KPP\_Cl2})$                 | see note                                    |
| H6200f | TrAa01ClMblScScm | $\text{HCl} \rightarrow \text{HCl}(\text{aq})$                                                              | $k_{\text{exf}}(01, \text{KPP\_HCl})$                 | see note                                    |
| H6200b | TrAa01ClMblScScm | $\text{HCl}(\text{aq}) \rightarrow \text{HCl}$                                                              | $k_{\text{exb}}(01, \text{KPP\_HCl})$                 | see note                                    |
| H6201f | TrAa01ClMblSc    | $\text{HOCl} \rightarrow \text{HOCl}(\text{aq})$                                                            | $k_{\text{exf}}(01, \text{KPP\_HOCl})$                | see note                                    |
| H6201b | TrAa01ClMblSc    | $\text{HOCl}(\text{aq}) \rightarrow \text{HOCl}$                                                            | $k_{\text{exb}}(01, \text{KPP\_HOCl})$                | see note                                    |
| H6300  | TrAa01ClMblN     | $\text{N}_2\text{O}_5 + \text{Cl}^-(\text{aq}) \rightarrow \text{ClNO}_2 + \text{NO}_3^-(\text{aq})$        | $k_{\text{exf\_N2O5}}(01) * 5.E2$                     | Behnke et al. (1994), Behnke et al. (1997)* |
| H6301  | TrAa01ClMblN     | $\text{ClNO}_3 \rightarrow \text{HOCl}(\text{aq}) + \text{HNO}_3(\text{aq})$                                | $k_{\text{exf\_ClNO3}}(01) * C(\text{KPP\_H2O\_a01})$ | see note                                    |
| H6302  | TrAa01ClMblN     | $\text{ClNO}_3 + \text{Cl}^-(\text{aq}) \rightarrow \text{Cl}_2(\text{aq}) + \text{NO}_3^-(\text{aq})$      | $k_{\text{exf\_ClNO3}}(01) * 5.E2$                    | see note                                    |
| H7000f | TrAa01BrMblSc    | $\text{Br}_2 \rightarrow \text{Br}_2(\text{aq})$                                                            | $k_{\text{exf}}(01, \text{KPP\_Br2})$                 | see note                                    |
| H7000b | TrAa01BrMblSc    | $\text{Br}_2(\text{aq}) \rightarrow \text{Br}_2$                                                            | $k_{\text{exb}}(01, \text{KPP\_Br2})$                 | see note                                    |
| H7200f | TrAa01BrMblScScm | $\text{HBr} \rightarrow \text{HBr}(\text{aq})$                                                              | $k_{\text{exf}}(01, \text{KPP\_HBr})$                 | see note                                    |
| H7200b | TrAa01BrMblScScm | $\text{HBr}(\text{aq}) \rightarrow \text{HBr}$                                                              | $k_{\text{exb}}(01, \text{KPP\_HBr})$                 | see note                                    |
| H7201f | TrAa01BrMblSc    | $\text{HOBr} \rightarrow \text{HOBr}(\text{aq})$                                                            | $k_{\text{exf}}(01, \text{KPP\_HOBr})$                | see note                                    |
| H7201b | TrAa01BrMblSc    | $\text{HOBr}(\text{aq}) \rightarrow \text{HOBr}$                                                            | $k_{\text{exb}}(01, \text{KPP\_HOBr})$                | see note                                    |
| H7300  | TrAa01BrMblN     | $\text{N}_2\text{O}_5 + \text{Br}^-(\text{aq}) \rightarrow \text{BrNO}_2 + \text{NO}_3^-(\text{aq})$        | $k_{\text{exf\_N2O5}}(01) * 3.E5$                     | Behnke et al. (1994), Behnke et al. (1997)* |
| H7301  | TrAa01BrMblN     | $\text{BrNO}_3 \rightarrow \text{HOBr}(\text{aq}) + \text{HNO}_3(\text{aq})$                                | $k_{\text{exf\_BrNO3}}(01) * C(\text{KPP\_H2O\_a01})$ | see note                                    |
| H7302  | TrAa01BrMblN     | $\text{BrNO}_3 + \text{Br}^-(\text{aq}) \rightarrow \text{Br}_2(\text{aq}) + \text{NO}_3^-(\text{aq})$      | $k_{\text{exf\_BrNO3}}(01) * 3.E5$                    | see note                                    |
| H7600f | TrAa01ClBrMblSc  | $\text{BrCl} \rightarrow \text{BrCl}(\text{aq})$                                                            | $k_{\text{exf}}(01, \text{KPP\_BrCl})$                | see note                                    |
| H7600b | TrAa01ClBrMblSc  | $\text{BrCl}(\text{aq}) \rightarrow \text{BrCl}$                                                            | $k_{\text{exb}}(01, \text{KPP\_BrCl})$                | see note                                    |
| H7601  | TrAa01ClBrMblN   | $\text{ClNO}_3 + \text{Br}^-(\text{aq}) \rightarrow \text{BrCl}(\text{aq}) + \text{NO}_3^-(\text{aq})$      | $k_{\text{exf\_ClNO3}}(01) * 3.E5$                    | see note                                    |
| H7602  | TrAa01ClBrMblN   | $\text{BrNO}_3 + \text{Cl}^-(\text{aq}) \rightarrow \text{BrCl}(\text{aq}) + \text{NO}_3^-(\text{aq})$      | $k_{\text{exf\_BrNO3}}(01) * 5.E2$                    | see note                                    |
| H8000f | TrAa01ISc        | $\text{I}_2 \rightarrow \text{I}_2(\text{aq})$                                                              | $k_{\text{exf}}(01, \text{KPP\_I2})$                  | see note                                    |
| H8000b | TrAa01ISc        | $\text{I}_2(\text{aq}) \rightarrow \text{I}_2$                                                              | $k_{\text{exb}}(01, \text{KPP\_I2})$                  | see note                                    |
| H8100f | TrAa01IMblSc     | $\text{IO} \rightarrow \text{IO}(\text{aq})$                                                                | $k_{\text{exf}}(01, \text{KPP\_IO})$                  | see note                                    |
| H8100b | TrAa01IMblSc     | $\text{IO}(\text{aq}) \rightarrow \text{IO}$                                                                | $k_{\text{exb}}(01, \text{KPP\_IO})$                  | see note                                    |
| H8101  | TrAa01I          | $\text{OIO} \rightarrow \text{HOI}(\text{aq}) + \text{HO}_2(\text{aq})$                                     | $k_{\text{exf}}(01, \text{KPP\_OIO})$                 | see note                                    |
| H8102  | TrAa01I          | $\text{I}_2\text{O}_2 \rightarrow \text{HOI}(\text{aq}) + \text{H}^+(\text{aq}) + \text{IO}_2^-(\text{aq})$ | $k_{\text{exf}}(01, \text{KPP\_I2O2})$                | see note                                    |
| H8200f | TrAa01IMblSc     | $\text{HOI} \rightarrow \text{HOI}(\text{aq})$                                                              | $k_{\text{exf}}(01, \text{KPP\_HOI})$                 | see note                                    |
| H8200b | TrAa01IMblSc     | $\text{HOI}(\text{aq}) \rightarrow \text{HOI}$                                                              | $k_{\text{exb}}(01, \text{KPP\_HOI})$                 | see note                                    |
| H8201  | TrAa01IMblSc     | $\text{HI} \rightarrow \text{H}^+(\text{aq}) + \text{I}^-(\text{aq})$                                       | $k_{\text{mt}}(\text{HI}) \cdot lwc$                  | see note                                    |

Table 3: Henry’s law equilibria

| #      | labels          | reaction                                                                                                 | rate coefficient                                           | reference |
|--------|-----------------|----------------------------------------------------------------------------------------------------------|------------------------------------------------------------|-----------|
| H8202  | TrAa01ISc       | $\text{HIO}_3 \rightarrow \text{IO}_3^-(\text{aq}) + \text{H}^+(\text{aq})$                              | $k_{\text{mt}}(\text{HIO}_3) \cdot lwc$                    | see note  |
| H8300  | TrAa01I         | $\text{INO}_2 \rightarrow \text{HOI}(\text{aq}) + \text{HONO}(\text{aq})$                                | $k_{\text{exf}}(01, \text{KPP\_INO2})$                     | see note  |
| H8301  | TrAa01IMbl      | $\text{INO}_3 \rightarrow \text{HOI}(\text{aq}) + \text{HNO}_3(\text{aq})$                               | $k_{\text{exf}}(01, \text{KPP\_INO3})$                     | see note  |
| H8600f | TrAa01ClIMblSc  | $\text{ICl} \rightarrow \text{ICl}(\text{aq})$                                                           | $k_{\text{exf}}(01, \text{KPP\_ICl})$                      | see note  |
| H8600b | TrAa01ClIMblSc  | $\text{ICl}(\text{aq}) \rightarrow \text{ICl}$                                                           | $k_{\text{exb}}(01, \text{KPP\_ICl})$                      | see note  |
| H8700f | TrAa01BrIMblSc  | $\text{IBr} \rightarrow \text{IBr}(\text{aq})$                                                           | $k_{\text{exf}}(01, \text{KPP\_IBr})$                      | see note  |
| H8700b | TrAa01BrIMblSc  | $\text{IBr}(\text{aq}) \rightarrow \text{IBr}$                                                           | $k_{\text{exb}}(01, \text{KPP\_IBr})$                      | see note  |
| H9100f | TrAa01SMblScScm | $\text{SO}_2 \rightarrow \text{SO}_2(\text{aq})$                                                         | $k_{\text{exf}}(01, \text{KPP\_SO2})$                      | see note  |
| H9100b | TrAa01SMblScScm | $\text{SO}_2(\text{aq}) \rightarrow \text{SO}_2$                                                         | $k_{\text{exb}}(01, \text{KPP\_SO2})$                      | see note  |
| H9200  | TrAa01SMblScScm | $\text{H}_2\text{SO}_4 \rightarrow \text{H}_2\text{SO}_4(\text{aq})$                                     | $\text{xnom7sulf} * k_{\text{exf}}(01, \text{KPP\_H2SO4})$ | see note  |
| H9400f | TrAa01S         | $\text{DMSO} \rightarrow \text{DMSO}(\text{aq})$                                                         | $k_{\text{exf}}(01, \text{KPP\_DMSO})$                     | see note  |
| H9400b | TrAa01S         | $\text{DMSO}(\text{aq}) \rightarrow \text{DMSO}$                                                         | $k_{\text{exb}}(01, \text{KPP\_DMSO})$                     | see note  |
| H9401  | TrAa01SMbl      | $\text{CH}_3\text{SO}_3\text{H} \rightarrow \text{CH}_3\text{SO}_3^-(\text{aq}) + \text{H}^+(\text{aq})$ | $k_{\text{exf}}(01, \text{KPP\_CH3SO3H})$                  | see note  |

\*Notes:

The forward ( $k_{\text{exf}}$ ) and backward ( $k_{\text{exb}}$ ) rate coefficients are calculated in the file `messy_mecca_mbl.f90` using the accommodation coefficients in subroutine `mecca_mbl_alpha` and Henry’s law constants in subroutine `mecca_mbl_henry`.

$k_{\text{mt}}$  = mass transfer coefficient

$lwc$  = liquid water content of aerosol mode

H3201, H6300, H6301, H6302, H7300, H7301, H7302, H7601, H7602: For uptake of  $X$  ( $= \text{N}_2\text{O}_5$ ,  $\text{ClNO}_3$ ,  $\text{BrNO}_3$ ) and subsequent reaction with  $\text{H}_2\text{O}$ ,  $\text{Cl}^-$ , and  $\text{Br}^-$ , we define  $k_{\text{exf}}(X) = k_{\text{mt}}(X) \times lwc / ([\text{H}_2\text{O}] + 5.0E2[\text{Cl}^-] + 3.0E5[\text{Br}^-])$ .

H6301, H6302, H7601: The total uptake is determined

by  $k_{\text{mt}}(\text{ClNO}_3)$ . The relative rates are assumed to be the same as for  $\text{N}_2\text{O}_5$  (H3201, H6300, H7300).

H7301, H7302, H7602: The total uptake is determined by  $k_{\text{mt}}(\text{BrNO}_3)$ . The relative rates are assumed to be the same as for  $\text{N}_2\text{O}_5$  (H3201, H6300, H7300).



Table 4: Acid-base and other equilibria

| #    | labels           | reaction                                                               | $K_0[M^{m-n}]$ | $-\Delta H/R[K]$ | reference                           |
|------|------------------|------------------------------------------------------------------------|----------------|------------------|-------------------------------------|
| EQ20 | TrAa01Sc         | $\text{HO}_2 \rightleftharpoons \text{O}_2^- + \text{H}^+$             | 1.6E-5         |                  | Weinstein-Lloyd and Schwartz (1991) |
| EQ21 | TrAa01MblScScm   | $\text{H}_2\text{O} \rightleftharpoons \text{H}^+ + \text{OH}^-$       | 1.0E-16        | -6716            | Chameides (1984)                    |
| EQ30 | TrAa01MblNScScm  | $\text{NH}_4^+ \rightleftharpoons \text{H}^+ + \text{NH}_3$            | 5.88E-10       | -2391            | Chameides (1984)                    |
| EQ31 | TrAa01NSc        | $\text{HONO} \rightleftharpoons \text{H}^+ + \text{NO}_2^-$            | 5.1E-4         | -1260            | Schwartz and White (1981)           |
| EQ32 | TrAa01MblNScScm  | $\text{HNO}_3 \rightleftharpoons \text{H}^+ + \text{NO}_3^-$           | 15             | 8700             | Davis and de Bruin (1964)           |
| EQ33 | TrAa01NSc        | $\text{HNO}_4 \rightleftharpoons \text{NO}_4^- + \text{H}^+$           | 1.E-5          |                  | Warneck (1999)                      |
| EQ40 | TrAa01MblScScm   | $\text{CO}_2 \rightleftharpoons \text{H}^+ + \text{HCO}_3^-$           | 4.3E-7         | -913             | Chameides (1984)*                   |
| EQ41 | TrAa01ScScm      | $\text{HCOOH} \rightleftharpoons \text{H}^+ + \text{HCOO}^-$           | 1.8E-4         |                  | Weast (1980)                        |
| EQ60 | TrAa01Cl         | $\text{Cl}_2 \rightleftharpoons \text{Cl} + \text{Cl}^-$               | 5.2E-6         |                  | Jayson et al. (1973)                |
| EQ61 | TrAa01ClMblScScm | $\text{HCl} \rightleftharpoons \text{H}^+ + \text{Cl}^-$               | 1.7E6          | 6896             | Marsh and McElroy (1985)            |
| EQ62 | TrAa01ClSc       | $\text{HOCl} \rightleftharpoons \text{H}^+ + \text{ClO}^-$             | 3.2E-8         |                  | Lax (1969)                          |
| EQ70 | TrAa01Br         | $\text{Br}_2^- \rightleftharpoons \text{Br} + \text{Br}^-$             | 2.54E-6        | -2256            | Liu et al. (2002)                   |
| EQ71 | TrAa01BrMblScScm | $\text{HBr} \rightleftharpoons \text{H}^+ + \text{Br}^-$               | 1.0E9          |                  | Lax (1969)                          |
| EQ72 | TrAa01BrSc       | $\text{HOBr} \rightleftharpoons \text{H}^+ + \text{BrO}^-$             | 2.3E-9         | -3091            | Kelley and Tartar (1956)*           |
| EQ73 | TrAa01ClBrMbl    | $\text{BrCl} + \text{Cl}^- \rightleftharpoons \text{BrCl}_2^-$         | 3.8            | 1191             | Wang et al. (1994)                  |
| EQ74 | TrAa01ClBrMbl    | $\text{BrCl} + \text{Br}^- \rightleftharpoons \text{Br}_2\text{Cl}^-$  | 1.8E4          | 7457             | Wang et al. (1994)                  |
| EQ75 | TrAa01ClBrMbl    | $\text{Br}_2 + \text{Cl}^- \rightleftharpoons \text{Br}_2\text{Cl}^-$  | 1.3            | 0                | Wang et al. (1994)                  |
| EQ76 | TrAa01ClBrMbl    | $\text{Br}^- + \text{Cl}_2 \rightleftharpoons \text{BrCl}_2^-$         | 4.2E6          | 14072            | Wang et al. (1994)                  |
| EQ80 | TrAa01ClMblSc    | $\text{ICl} + \text{Cl}^- \rightleftharpoons \text{ICl}_2^-$           | 7.7E1          |                  | Wang et al. (1989)                  |
| EQ81 | TrAa01BrIMblSc   | $\text{IBr} + \text{Br}^- \rightleftharpoons \text{IBr}_2^-$           | 2.9E2          |                  | Troy and Margerum (1991)            |
| EQ82 | TrAa01ClBrIMblSc | $\text{ICl} + \text{Br}^- \rightleftharpoons \text{IBr} + \text{Cl}^-$ | 3.3E2          |                  | see note                            |
| EQ90 | TrAa01SMblScScm  | $\text{SO}_2 \rightleftharpoons \text{H}^+ + \text{HSO}_3^-$           | 1.7E-2         | 2090             | Chameides (1984)                    |
| EQ91 | TrAa01SMblScScm  | $\text{HSO}_3^- \rightleftharpoons \text{H}^+ + \text{SO}_3^{2-}$      | 6.0E-8         | 1120             | Chameides (1984)                    |
| EQ92 | TrAa01SMblScScm  | $\text{HSO}_4^- \rightleftharpoons \text{H}^+ + \text{SO}_4^{2-}$      | 1.2E-2         | 2720             | Seinfeld and Pandis (1998)          |
| EQ93 | TrAa01SMblScScm  | $\text{H}_2\text{SO}_4 \rightleftharpoons \text{H}^+ + \text{HSO}_4^-$ | 1.0E3          |                  | Seinfeld and Pandis (1998)          |

\*Notes:

EQ40: For  $pK_a(\text{CO}_2)$ , see also Dickson and Millero (1987).EQ72: For  $pK_a(\text{HOBr})$ , see also Keller-Rudek et al. (1992).

EQ82: Thermodynamic calculations on the IBr/ICl equilibrium according to the data tables from Wagman et al. (1982):

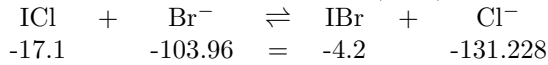

$$\frac{\Delta G}{[\text{kJ/mol}]} = -4.2 - 131.228 - (-17.1 - 103.96) = -14.368$$

$$K = \frac{[\text{IBr}] \times [\text{Cl}^-]}{[\text{ICl}] \times [\text{Br}^-]} = \exp\left(\frac{-\Delta G}{RT}\right) = \exp\left(\frac{14368}{8.314 \times 298}\right) = 330$$

This means we have equal amounts of IBr and ICl when the  $[\text{Cl}^-]/[\text{Br}^-]$  ratio equals 330.

Table 5: Aqueous phase reactions

| #      | labels    | reaction                                       | $k_0 [M^{1-n}s^{-1}]$ | $-E_a/R[K]$ | reference                       |
|--------|-----------|------------------------------------------------|-----------------------|-------------|---------------------------------|
| A1000  | TrAa01Sc  | $O_3 + O_2^- \rightarrow OH + OH^-$            | 1.5E9                 |             | Sehested et al. (1983)          |
| A2100  | TrAa01Sc  | $OH + O_2^- \rightarrow OH^-$                  | 1.0E10                |             | Sehested et al. (1968)          |
| A2101  | TrAa01Sc  | $OH + OH \rightarrow H_2O_2$                   | 5.5E9                 |             | Buxton et al. (1988)            |
| A2102  | TrAa01Sc  | $HO_2 + O_2^- \rightarrow H_2O_2 + OH^-$       | 1.0E8                 | -900        | Christensen and Sehested (1988) |
| A2103  | TrAa01Sc  | $HO_2 + OH \rightarrow H_2O$                   | 7.1E9                 |             | Sehested et al. (1968)          |
| A2104  | TrAa01Sc  | $HO_2 + HO_2 \rightarrow H_2O_2$               | 9.7E5                 | -2500       | Christensen and Sehested (1988) |
| A2105  | TrAa01Sc  | $H_2O_2 + OH \rightarrow HO_2$                 | 2.7E7                 | -1684       | Christensen et al. (1982)       |
| A3100  | TrAa01NSc | $NO_2^- + O_3 \rightarrow NO_3^-$              | 5.0E5                 | -6950       | Damschen and Martin (1983)      |
| A3101  | TrAa01NSc | $NO_2 + NO_2 \rightarrow HNO_3 + HONO$         | 1.0E8                 |             | Lee and Schwartz (1981)         |
| A3102  | TrAa01NSc | $NO_4^- \rightarrow NO_2^-$                    | 8.0E1                 |             | Warneck (1999)                  |
| A3200  | TrAa01NSc | $NO_2 + HO_2 \rightarrow HNO_4$                | 1.8E9                 |             | Warneck (1999)                  |
| A3201  | TrAa01NSc | $NO_2^- + OH \rightarrow NO_2 + OH^-$          | 1.0E10                |             | Wingenter et al. (1999)         |
| A3202  | TrAa01NSc | $NO_3 + OH^- \rightarrow NO_3^- + OH$          | 8.2E7                 | -2700       | Exner et al. (1992)             |
| A3203  | TrAa01NSc | $HONO + OH \rightarrow NO_2$                   | 1.0E10                |             | Barker et al. (1970)            |
| A3204  | TrAa01NSc | $HONO + H_2O_2 \rightarrow HNO_3$              | 4.6E3                 | -6800       | Damschen and Martin (1983)      |
| A4100  | TrAa01Sc  | $CO_3^- + O_2^- \rightarrow HCO_3^- + OH^-$    | 6.5E8                 |             | Ross et al. (1992)              |
| A4101  | TrAa01Sc  | $CO_3^- + H_2O_2 \rightarrow HCO_3^- + HO_2$   | 4.3E5                 |             | Ross et al. (1992)              |
| A4102  | TrAa01Sc  | $HCOO^- + CO_3^- \rightarrow 2 HCO_3^- + HO_2$ | 1.5E5                 |             | Ross et al. (1992)              |
| A4103  | TrAa01Sc  | $HCOO^- + OH \rightarrow OH^- + HO_2 + CO_2$   | 3.1E9                 | -1240       | Chin and Wine (1994)            |
| A4104  | TrAa01Sc  | $HCO_3^- + OH \rightarrow CO_3^-$              | 8.5E6                 |             | Ross et al. (1992)              |
| A4105  | TrAa01Sc  | $HCHO + OH \rightarrow HCOOH + HO_2$           | 7.7E8                 | -1020       | Chin and Wine (1994)            |
| A4106  | TrAa01Sc  | $HCOOH + OH \rightarrow HO_2 + CO_2$           | 1.1E8                 | -991        | Chin and Wine (1994)            |
| A4107  | TrAa01Sc  | $CH_3OO + O_2^- \rightarrow CH_3OOH + OH^-$    | 5.0E7                 |             | Jacob (1986)                    |
| A4108  | TrAa01Sc  | $CH_3OO + HO_2 \rightarrow CH_3OOH$            | 4.3E5                 |             | Jacob (1986)                    |
| A4109  | TrAa01Sc  | $CH_3OH + OH \rightarrow HCHO + HO_2$          | 9.7E8                 |             | Buxton et al. (1988)            |
| A4110a | TrAa01Sc  | $CH_3OOH + OH \rightarrow CH_3OO$              | 2.7E7                 | -1715       | Jacob (1986)                    |
| A4110b | TrAa01Sc  | $CH_3OOH + OH \rightarrow HCHO + OH$           | 1.1E7                 | -1715       | Jacob (1986)                    |
| A6000  | TrAa01Cl  | $Cl + Cl \rightarrow Cl_2$                     | 8.8E7                 |             | Wu et al. (1980)                |
| A6001  | TrAa01Cl  | $Cl_2^- + Cl_2^- \rightarrow Cl_2 + 2Cl^-$     | 1.8E9                 |             | Jacobi et al. (1999)            |
| A6100  | TrAa01Cl  | $Cl^- + O_3 \rightarrow ClO^-$                 | 3.0E-3                |             | Hoigné et al. (1985)            |
| A6101  | TrAa01Cl  | $Cl_2 + O_2^- \rightarrow Cl_2^-$              | 1.0E9                 |             | Bjergbakke et al. (1981)        |
| A6102  | TrAa01Cl  | $Cl_2^- + O_2^- \rightarrow 2 Cl^-$            | 1.0E9                 |             | Jacobi (1996)*                  |
| A6200  | TrAa01Cl  | $Cl + H_2O \rightarrow H^+ + ClOH^-$           | 1.3E3                 |             | Jayson et al. (1973)            |
| A6201  | TrAa01Cl  | $Cl + H_2O_2 \rightarrow HO_2 + Cl^- + H^+$    | 2.7E7                 | -1684       | Christensen et al. (1982)       |

Table 5: Aqueous phase reactions (...continued)

| #      | labels        | reaction                                             | $k_0$ [ $M^{1-n}s^{-1}$ ] | $-E_a/R[K]$ | reference                     |
|--------|---------------|------------------------------------------------------|---------------------------|-------------|-------------------------------|
| A6202  | TrAa01Cl      | $Cl^- + OH \rightarrow ClOH^-$                       | 4.3E9                     |             | Jayson et al. (1973)          |
| A6203  | TrAa01Cl      | $Cl_2 + HO_2 \rightarrow Cl_2^- + H^+$               | 1.0E9                     |             | Bjergbakke et al. (1981)      |
| A6204  | TrAa01ClMbl   | $Cl_2 \rightarrow Cl^- + HOCl + H^+$                 | 21.8                      | -8012       | Wang and Margerum (1994)      |
| A6205  | TrAa01Cl      | $Cl_2^- + HO_2 \rightarrow 2 Cl^- + H^+$             | 1.3E10                    |             | Jacobi (1996)                 |
| A6206  | TrAa01Cl      | $HOCl + O_2^- \rightarrow Cl + OH^-$                 | 7.5E6                     |             | Long and Bielski (1980)       |
| A6207  | TrAa01Cl      | $HOCl + HO_2 \rightarrow Cl$                         | 7.5E6                     |             | Long and Bielski (1980)       |
| A6208  | TrAa01ClMbl   | $HOCl + Cl^- + H^+ \rightarrow Cl_2$                 | 2.2E4                     | -3508       | Wang and Margerum (1994)      |
| A6209  | TrAa01Cl      | $ClOH^- \rightarrow Cl^- + OH$                       | 6.1E9                     |             | Jayson et al. (1973)          |
| A6210  | TrAa01Cl      | $ClOH^- + H^+ \rightarrow Cl$                        | 2.1E10                    |             | Jayson et al. (1973)          |
| A6300  | TrAa01Cl      | $Cl + NO_3^- \rightarrow NO_3 + Cl^-$                | 1.0E8                     |             | Buxton et al. (1999b)         |
| A6301  | TrAa01Cl      | $Cl^- + NO_3 \rightarrow NO_3^- + Cl$                | 3.4E8                     |             | Buxton et al. (1999b)*        |
| A6302  | TrAa01Cl      | $Cl_2^- + NO_2^- \rightarrow 2 Cl^- + NO_2$          | 6.0E7                     |             | Jacobi et al. (1996)          |
| A6400  | TrAa01Cl      | $Cl_2^- + CH_3OOH \rightarrow 2 Cl^- + H^+ + CH_3OO$ | 5.0E4                     |             | Jacobi et al. (1996)          |
| A7000  | TrAa01Br      | $Br_2^- + Br_2^- \rightarrow 2 Br^- + Br_2$          | 1.9E9                     |             | Ross et al. (1992)            |
| A7100  | TrAa01Br      | $Br^- + O_3 \rightarrow BrO^-$                       | 2.1E2                     | -4450       | Haag and Hoigné (1983)        |
| A7101  | TrAa01Br      | $Br_2 + O_2^- \rightarrow Br_2^-$                    | 5.6E9                     |             | Sutton and Downes (1972)      |
| A7102  | TrAa01Br      | $Br_2^- + O_2^- \rightarrow 2 Br^-$                  | 1.7E8                     |             | Wagner and Strehlow (1987)    |
| A7200  | TrAa01Br      | $Br^- + OH \rightarrow BrOH^-$                       | 1.1E10                    |             | Zehavi and Rabani (1972)      |
| A7201  | TrAa01Br      | $Br_2 + HO_2 \rightarrow Br_2^- + H^+$               | 1.1E8                     |             | Sutton and Downes (1972)      |
| A7202  | TrAa01BrMbl   | $Br_2 \rightarrow Br^- + HOBr + H^+$                 | 9.7E1                     | -7457       | Beckwith et al. (1996)        |
| A7203  | TrAa01Br      | $Br_2^- + HO_2 \rightarrow Br_2 + H_2O_2 + OH^-$     | 4.4E9                     |             | Matthew et al. (2003)         |
| A7204  | TrAa01Br      | $Br_2^- + H_2O_2 \rightarrow 2 Br^- + H^+ + HO_2$    | 1.0E5                     |             | Jacobi (1996)                 |
| A7205  | TrAa01Br      | $HOBr + O_2^- \rightarrow Br + OH^-$                 | 3.5E9                     |             | Schwarz and Bielski (1986)    |
| A7206  | TrAa01Br      | $HOBr + HO_2 \rightarrow Br$                         | 1.0E9                     |             | Herrmann et al. (1999)        |
| A7207  | TrAa01Br      | $HOBr + H_2O_2 \rightarrow Br^- + H^+$               | 1.2E6                     |             | Bichsel and von Gunten (1999) |
| A7208  | TrAa01BrMbl   | $HOBr + Br^- + H^+ \rightarrow Br_2$                 | 1.6E10                    |             | Beckwith et al. (1996)        |
| A7209a | TrAa01Br      | $BrOH^- \rightarrow Br^- + OH$                       | 3.3E7                     |             | Zehavi and Rabani (1972)      |
| A7209b | TrAa01Br      | $BrOH^- \rightarrow Br + OH^-$                       | 4.2E6                     |             | Zehavi and Rabani (1972)      |
| A7210  | TrAa01Br      | $BrOH^- + H^+ \rightarrow Br$                        | 4.4E10                    |             | Zehavi and Rabani (1972)      |
| A7300  | TrAa01Br      | $Br^- + NO_3 \rightarrow Br + NO_3^-$                | 4.0E9                     |             | Neta and Huie (1986)          |
| A7301  | TrAa01Br      | $Br_2^- + NO_2^- \rightarrow 2 Br^- + NO_2$          | 1.7E7                     | -1720       | Shoute et al. (1991)          |
| A7400  | TrAa01Br      | $Br_2^- + CH_3OOH \rightarrow 2 Br^- + H^+ + CH_3OO$ | 1.0E5                     |             | Jacobi (1996)*                |
| A7601  | TrAa01Br      | $Br^- + ClO^- + H^+ \rightarrow BrCl + OH^-$         | 3.7E10                    |             | Kumar and Margerum (1987)     |
| A7602  | TrAa01ClBrMbl | $Br^- + HOCl + H^+ \rightarrow BrCl$                 | 1.32E6                    |             | Kumar and Margerum (1987)     |

Table 5: Aqueous phase reactions (...continued)

| #     | labels          | reaction                                                                                                                                           | $k_0 [M^{1-n}s^{-1}]$ | $-E_a/R[K]$ | reference                                         |
|-------|-----------------|----------------------------------------------------------------------------------------------------------------------------------------------------|-----------------------|-------------|---------------------------------------------------|
| A7603 | TrAa01ClBrMbl   | $\text{HOBr} + \text{Cl}^- + \text{H}^+ \rightarrow \text{BrCl}$                                                                                   | 2.3E10                |             | see note                                          |
| A7604 | TrAa01ClBrMbl   | $\text{BrCl} \rightarrow \text{Cl}^- + \text{HOBr} + \text{H}^+$                                                                                   | 3.0E6                 |             | Liu and Margerum (2001)                           |
| A8100 | TrAa01IMbl      | $\text{I}^- + \text{O}_3 \rightarrow \text{HOI} + \text{OH}^-$                                                                                     | 4.2E9                 | -9311       | Magi et al. (1997)                                |
| A8101 | TrAa01IMbl      | $\text{IO} + \text{IO} \rightarrow \text{HOI} + \text{IO}_2^- + \text{H}^+$                                                                        | 1.5E9                 |             | Buxton et al. (1986)                              |
| A8200 | TrAa01IMbl      | $\text{IO}_2^- + \text{H}_2\text{O}_2 \rightarrow \text{IO}_3^-$                                                                                   | 6.0E1                 |             | Furrow (1987)                                     |
| A8201 | TrAa01I         | $\text{HOI} + \text{IO}_2^- \rightarrow \text{IO}_3^- + \text{I}^- + \text{H}^+$                                                                   | 6.0E2                 |             | Chinake and Simoyi (1996)                         |
| A8202 | TrAa01IMbl      | $\text{HOI} + \text{I}^- + \text{H}^+ \rightarrow \text{I}_2$                                                                                      | 4.4E12                |             | Eigen and Kustin (1962)                           |
| A8600 | TrAa01ClIMbl    | $\text{ICl} \rightarrow \text{HOI} + \text{Cl}^- + \text{H}^+$                                                                                     | 2.4E6                 |             | Wang et al. (1989)                                |
| A8601 | TrAa01ClIMbl    | $\text{I}^- + \text{HOCl} + \text{H}^+ \rightarrow \text{ICl}$                                                                                     | 3.5E11                |             | Nagy et al. (1988)                                |
| A8602 | TrAa01ClI       | $\text{IO}_2^- + \text{HOCl} \rightarrow \text{IO}_3^- + \text{Cl}^- + \text{H}^+$                                                                 | 1.5E3                 |             | Lengyel et al. (1996)                             |
| A8603 | TrAa01ClIMbl    | $\text{HOI} + \text{Cl}^- + \text{H}^+ \rightarrow \text{ICl}$                                                                                     | 2.9E10                |             | Wang et al. (1989)                                |
| A8604 | TrAa01ClI       | $\text{HOI} + \text{Cl}_2 \rightarrow \text{IO}_2^- + 2\text{Cl}^- + 3\text{H}^+$                                                                  | 1.0E6                 |             | Lengyel et al. (1996)                             |
| A8605 | TrAa01ClI       | $\text{HOI} + \text{HOCl} \rightarrow \text{IO}_2^- + \text{Cl}^- + 2\text{H}^+$                                                                   | 5.0E5                 |             | Citri and Epstein (1988)                          |
| A8700 | TrAa01BrIMbl    | $\text{IBr} \rightarrow \text{HOI} + \text{H}^+ + \text{Br}^-$                                                                                     | 8.0E5                 |             | Troy et al. (1991)                                |
| A8701 | TrAa01BrIMbl    | $\text{I}^- + \text{HOBr} \rightarrow \text{IBr} + \text{OH}^-$                                                                                    | 5.0E9                 |             | Troy and Margerum (1991)                          |
| A8702 | TrAa01BrI       | $\text{IO}_2^- + \text{HOBr} \rightarrow \text{IO}_3^- + \text{Br}^- + \text{H}^+$                                                                 | 1.0E6                 |             | Chinake and Simoyi (1996)                         |
| A8703 | TrAa01BrIMbl    | $\text{HOI} + \text{Br}^- + \text{H}^+ \rightarrow \text{IBr}$                                                                                     | 3.3E12                |             | Troy et al. (1991)                                |
| A8704 | TrAa01BrI       | $\text{HOI} + \text{HOBr} \rightarrow \text{IO}_2^- + \text{Br}^- + 2\text{H}^+$                                                                   | 1.0E6                 |             | Chinake and Simoyi (1996)                         |
| A9100 | TrAa01SSc       | $\text{SO}_3^- + \text{O}_2 \rightarrow \text{SO}_5^-$                                                                                             | 1.5E9                 |             | Huie and Neta (1987)                              |
| A9101 | TrAa01SMblScScm | $\text{SO}_3^{2-} + \text{O}_3 \rightarrow \text{SO}_4^{2-}$                                                                                       | 1.5E9                 | -5300       | Hoffmann (1986)                                   |
| A9102 | TrAa01SSc       | $\text{SO}_4^- + \text{O}_2^- \rightarrow \text{SO}_4^{2-}$                                                                                        | 3.5E9                 |             | Jiang et al. (1992)                               |
| A9103 | TrAa01SSc       | $\text{SO}_4^- + \text{SO}_3^{2-} \rightarrow \text{SO}_3^- + \text{SO}_4^{2-}$                                                                    | 4.6E8                 |             | Huie and Neta (1987)                              |
| A9104 | TrAa01SSc       | $\text{SO}_5^- + \text{O}_2^- \rightarrow \text{HSO}_5^- + \text{OH}^-$                                                                            | 2.3E8                 |             | Buxton et al. (1996)                              |
| A9105 | TrAa01S         | $\text{SO}_5^- + \text{SO}_3^{2-} \rightarrow .72 \text{SO}_4^- + .72 \text{SO}_4^{2-} + .28 \text{SO}_3^- + .28 \text{HSO}_5^- + .28 \text{OH}^-$ | 1.3E7                 |             | Huie and Neta (1987), Deister and Warneck (1990)* |
| A9106 | TrAa01S         | $\text{SO}_5^- + \text{SO}_5^- \rightarrow \text{O}_2 + \text{SO}_4^{2-}$                                                                          | 1.0E8                 |             | Ross et al. (1992)*                               |
| A9200 | TrAa01SSc       | $\text{SO}_3^{2-} + \text{OH} \rightarrow \text{SO}_3^- + \text{OH}^-$                                                                             | 5.5E9                 |             | Buxton et al. (1988)                              |
| A9201 | TrAa01SSc       | $\text{SO}_4^- + \text{OH} \rightarrow \text{HSO}_5^-$                                                                                             | 1.0E9                 |             | Jiang et al. (1992)                               |
| A9202 | TrAa01SSc       | $\text{SO}_4^- + \text{HO}_2 \rightarrow \text{SO}_4^{2-} + \text{H}^+$                                                                            | 3.5E9                 |             | Jiang et al. (1992)                               |
| A9203 | TrAa01SSc       | $\text{SO}_4^- + \text{H}_2\text{O} \rightarrow \text{SO}_4^{2-} + \text{H}^+ + \text{OH}$                                                         | 1.1E1                 | -1110       | Herrmann et al. (1995)                            |
| A9204 | TrAa01SSc       | $\text{SO}_4^- + \text{H}_2\text{O}_2 \rightarrow \text{SO}_4^{2-} + \text{H}^+ + \text{HO}_2$                                                     | 1.2E7                 |             | Wine et al. (1989)                                |
| A9205 | TrAa01SSc       | $\text{HSO}_3^- + \text{O}_2^- \rightarrow \text{SO}_4^{2-} + \text{OH}$                                                                           | 3.0E3                 |             | see note                                          |
| A9206 | TrAa01SMblScScm | $\text{HSO}_3^- + \text{O}_3 \rightarrow \text{SO}_4^{2-} + \text{H}^+$                                                                            | 3.7E5                 | -5500       | Hoffmann (1986)                                   |
| A9207 | TrAa01SSc       | $\text{HSO}_3^- + \text{OH} \rightarrow \text{SO}_3^-$                                                                                             | 4.5E9                 |             | Buxton et al. (1988)                              |

Table 5: Aqueous phase reactions (...continued)

| #     | labels          | reaction                                                                                                                                        | $k_0 [M^{1-n}s^{-1}]$ | $-E_a/R[K]$ | reference                     |
|-------|-----------------|-------------------------------------------------------------------------------------------------------------------------------------------------|-----------------------|-------------|-------------------------------|
| A9208 | TrAa01SSc       | $\text{HSO}_3^- + \text{HO}_2 \rightarrow \text{SO}_4^{2-} + \text{OH} + \text{H}^+$                                                            | 3.0E3                 |             | see note                      |
| A9209 | TrAa01SMblScScm | $\text{HSO}_3^- + \text{H}_2\text{O}_2 \rightarrow \text{SO}_4^{2-} + \text{H}^+$                                                               | 5.2E6                 | -3650       | Martin and Damschen (1981)    |
| A9210 | TrAa01SSc       | $\text{HSO}_3^- + \text{SO}_4^- \rightarrow \text{SO}_3^- + \text{SO}_4^{2-} + \text{H}^+$                                                      | 8.0E8                 |             | Huie and Neta (1987)          |
| A9211 | TrAa01S         | $\text{HSO}_3^- + \text{SO}_5^- \rightarrow .75 \text{SO}_4^- + .75 \text{SO}_4^{2-} + .75 \text{H}^+ + .25 \text{SO}_3^- + .25 \text{HSO}_5^-$ | 1.0E5                 |             | Huie and Neta (1987)          |
| A9212 | TrAa01SSc       | $\text{HSO}_3^- + \text{HSO}_5^- \rightarrow 2 \text{SO}_4^{2-} + 2 \text{H}^+$                                                                 | 7.1E6                 |             | Betterton and Hoffmann (1988) |
| A9300 | TrAa01SSc       | $\text{SO}_3^{2-} + \text{NO}_2 \rightarrow \text{SO}_4^{2-} + 2 \text{HONO} - \text{NO}_2$                                                     | 2.0E7                 |             | Clifton et al. (1988)         |
| A9301 | TrAa01SSc       | $\text{SO}_4^- + \text{NO}_3^- \rightarrow \text{SO}_4^{2-} + \text{NO}_3$                                                                      | 5.0E4                 |             | Exner et al. (1992)           |
| A9302 | TrAa01SSc       | $\text{SO}_4^{2-} + \text{NO}_3 \rightarrow \text{NO}_3^- + \text{SO}_4^-$                                                                      | 1.0E5                 |             | Logager et al. (1993)         |
| A9303 | TrAa01SSc       | $\text{HSO}_3^- + \text{NO}_2 \rightarrow \text{HSO}_4^- + 2 \text{HONO} - \text{NO}_2$                                                         | 2.0E7                 |             | Clifton et al. (1988)         |
| A9304 | TrAa01SSc       | $\text{HSO}_3^- + \text{NO}_3 \rightarrow \text{SO}_3^- + \text{NO}_3^- + \text{H}^+$                                                           | 1.4E9                 | -2000       | Exner et al. (1992)           |
| A9305 | TrAa01SSc       | $\text{HSO}_3^- + \text{HNO}_4 \rightarrow \text{HSO}_4^- + \text{NO}_3^- + \text{H}^+$                                                         | 3.1E5                 |             | Warneck (1999)                |
| A9400 | TrAa01SSc       | $\text{SO}_3^{2-} + \text{HCHO} \rightarrow \text{CH}_2\text{OH}\text{SO}_3^- + \text{OH}^-$                                                    | 1.4E4                 |             | Boyce and Hoffmann (1984)     |
| A9401 | TrAa01SSc       | $\text{SO}_3^{2-} + \text{CH}_3\text{OOH} \rightarrow \text{SO}_4^{2-} + \text{CH}_3\text{OH}$                                                  | 1.6E7                 | -3800       | Lind et al. (1987)            |
| A9402 | TrAa01SSc       | $\text{HSO}_3^- + \text{HCHO} \rightarrow \text{CH}_2\text{OH}\text{SO}_3^-$                                                                    | 4.3E-1                |             | Boyce and Hoffmann (1984)     |
| A9403 | TrAa01SSc       | $\text{HSO}_3^- + \text{CH}_3\text{OOH} \rightarrow \text{SO}_4^{2-} + \text{H}^+ + \text{CH}_3\text{OH}$                                       | 1.6E7                 | -3800       | Lind et al. (1987)            |
| A9404 | TrAa01SSc       | $\text{CH}_2\text{OH}\text{SO}_3^- + \text{OH}^- \rightarrow \text{SO}_3^{2-} + \text{HCHO}$                                                    | 3.6E3                 |             | Seinfeld and Pandis (1998)    |
| A9600 | TrAa01SCl       | $\text{SO}_3^{2-} + \text{Cl}_2^- \rightarrow \text{SO}_3^- + 2 \text{Cl}^-$                                                                    | 6.2E7                 |             | Jacobi et al. (1996)          |
| A9601 | TrAa01SClMbl    | $\text{SO}_3^{2-} + \text{HOCl} \rightarrow \text{Cl}^- + \text{HSO}_4^-$                                                                       | 7.6E8                 |             | Fogelman et al. (1989)        |
| A9602 | TrAa01SCl       | $\text{SO}_4^- + \text{Cl}^- \rightarrow \text{SO}_4^{2-} + \text{Cl}$                                                                          | 2.5E8                 |             | Buxton et al. (1999a)         |
| A9603 | TrAa01SCl       | $\text{SO}_4^{2-} + \text{Cl} \rightarrow \text{SO}_4^- + \text{Cl}^-$                                                                          | 2.1E8                 |             | Buxton et al. (1999a)         |
| A9604 | TrAa01SCl       | $\text{HSO}_3^- + \text{Cl}_2^- \rightarrow \text{SO}_3^- + 2 \text{Cl}^- + \text{H}^+$                                                         | 4.7E8                 | -1082       | Shoute et al. (1991)          |
| A9605 | TrAa01SClMbl    | $\text{HSO}_3^- + \text{HOCl} \rightarrow \text{Cl}^- + \text{HSO}_4^- + \text{H}^+$                                                            | 7.6E8                 |             | see note                      |
| A9606 | TrAa01SCl       | $\text{HSO}_5^- + \text{Cl}^- \rightarrow \text{HOCl} + \text{SO}_4^{2-}$                                                                       | 1.8E-3                | -7352       | Fortnum et al. (1960)         |
| A9700 | TrAa01SBr       | $\text{SO}_3^{2-} + \text{Br}_2^- \rightarrow 2 \text{Br}^- + \text{SO}_3^-$                                                                    | 2.2E8                 | -649        | Shoute et al. (1991)          |
| A9701 | TrAa01SBr       | $\text{SO}_3^{2-} + \text{BrO}^- \rightarrow \text{Br}^- + \text{SO}_4^{2-}$                                                                    | 1.0E8                 |             | Troy and Margerum (1991)      |
| A9702 | TrAa01SBrMbl    | $\text{SO}_3^{2-} + \text{HOBr} \rightarrow \text{Br}^- + \text{HSO}_4^-$                                                                       | 5.0E9                 |             | Troy and Margerum (1991)      |
| A9703 | TrAa01SBr       | $\text{SO}_4^- + \text{Br}^- \rightarrow \text{Br} + \text{SO}_4^{2-}$                                                                          | 2.1E9                 |             | Jacobi (1996)                 |
| A9704 | TrAa01SBr       | $\text{HSO}_3^- + \text{Br}_2^- \rightarrow 2 \text{Br}^- + \text{H}^+ + \text{SO}_3^-$                                                         | 6.3E7                 | -782        | Shoute et al. (1991)          |
| A9705 | TrAa01SBrMbl    | $\text{HSO}_3^- + \text{HOBr} \rightarrow \text{Br}^- + \text{HSO}_4^- + \text{H}^+$                                                            | 5.0E9                 |             | see note                      |
| A9706 | TrAa01SBr       | $\text{HSO}_5^- + \text{Br}^- \rightarrow \text{HOBr} + \text{SO}_4^{2-}$                                                                       | 1.0E0                 | -5338       | Fogelman et al. (1989)        |
| A9800 | TrAa01SI        | $\text{HSO}_3^- + \text{I}_2 \rightarrow 2 \text{I}^- + \text{HSO}_4^- + 2 \text{H}^+$                                                          | 1.0E6                 |             | Olsen and Epstein (1991)      |

\*Notes:

A6102: Jacobi (1996) found an upper limit of **6E9** and cite an upper limit from another study of **2E9**. Here, we set the rate coefficient to **1E9**.

A6301: There is also an earlier study by Exner et al. (1992) which found a smaller rate coefficient but did not consider the back reaction.

A7400: Assumed to be the same as for  $\text{Br}_2^- + \text{H}_2\text{O}_2$ .

A9105: The rate coefficient for the sum of the paths (leading to either  $\text{HSO}_5^-$  or  $\text{SO}_4^{2-}$ ) is from Huie and Neta (1987), the ratio 0.28/0.72 is from Deister and Warneck (1990).

A9106: See also: (Huie and Neta, 1987; Warneck, 1991). If this reaction produces a lot of  $\text{SO}_4^-$ , it will have an effect. However, we currently assume only the stable  $\text{S}_2\text{O}_8^{2-}$  as product. Since  $\text{S}_2\text{O}_8^{2-}$  is not treated explicitly

in the mechanism, we use  $\text{SO}_4^{2-}$  as a proxy. Note that this destroys the mass consistency for sulfur species.

A9205: D. Sedlak, pers. comm. (1993).

A9208: D. Sedlak, pers. comm. (1993).

A9605: assumed to be the same as for  $\text{SO}_3^{2-} + \text{HOCl}$ .

A9705: assumed to be the same as for  $\text{SO}_3^{2-} + \text{HOBr}$ .

## References

- Abbatt, J. P. D. and Waschewsky, G. C. G.: Heterogeneous interactions of HOBr, HNO<sub>3</sub>, O<sub>3</sub>, and NO<sub>2</sub> with deliquescent NaCl aerosols at room temperature, *J. Phys. Chem. A*, 102, 3719–3725, 1998.
- Barker, G. C., Fowles, P., and Stringer, B.: Pulse radiolytic induced transient electrical conductance in liquid solutions, *Trans. Faraday Soc.*, 66, 1509–1519, 1970.
- Bartlett, W. P. and Margerum, D. W.: Temperature dependencies of the Henry's law constant and the aqueous phase dissociation constant of bromine chloride, *Environ. Sci. Technol.*, 33, 3410–3414, 1999.
- Beckwith, R. C., Wang, T. X., and Margerum, D. W.: Equilibrium and kinetics of bromine hydrolysis, *Inorg. Chem.*, 35, 995–1000, 1996.
- Behnke, W., Scheer, V., and Zetzsch, C.: Production of BrNO<sub>2</sub>, Br<sub>2</sub> and ClNO<sub>2</sub> from the reaction between sea spray aerosol and N<sub>2</sub>O<sub>5</sub>, *J. Aerosol Sci.*, 25, S277–S278, 1994.
- Behnke, W., George, C., Scheer, V., and Zetzsch, C.: Production and decay of ClNO<sub>2</sub> from the reaction of gaseous N<sub>2</sub>O<sub>5</sub> with NaCl solution: Bulk and aerosol experiments, *J. Geophys. Res.*, 102D, 3795–3804, 1997.
- Betterton, E. A. and Hoffmann, M. R.: Oxidation of aqueous SO<sub>2</sub> by peroxymonosulfate, *J. Phys. Chem.*, 92, 5962–5965, 1988.
- Bichsel, Y. and von Gunten, U.: Oxidation of iodide and hypiodous acid in the disinfection of natural waters, *Environ. Sci. Technol.*, 33, 4040–4045, 1999.
- Bjergbakke, E., Navartnam, S., Parsons, B. J., and Swallow, A. J.: Reaction between HO<sub>2</sub>· and chlorine in aqueous solution, *J. Am. Chem. Soc.*, 103, 5926–5928, 1981.
- Boyce, S. D. and Hoffmann, M. R.: Kinetics and mechanism of the formation of hydroxymethanesulfonic acid at low pH, *J. Phys. Chem.*, 88, 4740–4746, 1984.
- Brimblecombe, P. and Clegg, S. L.: Erratum, *J. Atmos. Chem.*, 8, 95, 1989.
- Buxton, G. V., Kilner, C., and Sellers, R. M.: Pulse radiolysis of HOI and IO<sup>−</sup> in aqueous solution. Formation and characterization of I(II), *Proc. Tihany Symp. Radiat. Chem.*, 6, 155–159, 1986.
- Buxton, G. V., Greenstock, C. L., Helman, W. P., and Ross, A. B.: Critical review of rate constants for reactions of hydrated electrons, hydrogen atoms and hydroxyl radicals (·OH/·O<sup>−</sup>) in aqueous solution, *J. Phys. Chem. Ref. Data*, 17, 513–886, 1988.
- Buxton, G. V., McGowan, S., Salmon, G. A., Williams, J. E., and Wood, N. D.: A study of the spectra and reactivity of oxysulphur-radical anions involved in the chain oxidation of S(IV): A pulse and γ-radiolysis study, *Atmos. Environ.*, 30, 2483–2493, 1996.
- Buxton, G. V., Bydder, M., and Salmon, G. A.: The reactivity of chlorine atoms in aqueous solution: Part II. The equilibrium  $\text{SO}_4^{\cdot-} + \text{Cl}^- \rightleftharpoons \text{Cl}^\cdot + \text{SO}_4^{2-}$ , *Phys. Chem. Chem. Phys.*, 1, 269–273, 1999a.
- Buxton, G. V., Salmon, G. A., and Wang, J. Q.: The equilibrium  $\text{NO}_3 + \text{Cl}^- \rightleftharpoons \text{NO}_3^- + \text{Cl}^\cdot$ : A laser flash photolysis and pulse radiolysis study of the reactivity of NO<sub>3</sub> with chloride ion in aqueous solution, *Phys. Chem. Chem. Phys.*, 1, 3589–3593, 1999b.
- Chameides, W. L.: The photochemistry of a remote marine stratiform cloud, *J. Geophys. Res.*, 89D, 4739–4755, 1984.
- Chatfield, R. B. and Crutzen, P. J.: Are there interactions of iodine and sulfur species in marine air photochemistry?, *J. Geophys. Res.*, 95D, 22 319–22 341, 1990.
- Chin, M. and Wine, P. H.: A temperature-dependent competitive kinetics study of the aqueous-phase reactions of OH radicals with formate, formic acid, acetate, acetic acid, and hydrated formaldehyde, in: *Aquatic and Surface Photochemistry*, edited by Helz, G. R., Zepp, R. G., and Crosby, D. G., pp. 85–96, A. F. Lewis, NY, 1994.
- Chinake, C. R. and Simoyi, R. H.: Kinetics and mechanism of the complex bromate-iodine reaction, *J. Phys. Chem.*, 100, 1643–1656, 1996.
- Christensen, H. and Sehested, K.: HO<sub>2</sub> and O<sub>2</sub><sup>−</sup> radicals at elevated temperatures, *J. Phys. Chem.*, 92, 3007–3011, 1988.
- Christensen, H., Sehested, K., and Corfitzen, H.: Reactions of hydroxyl radicals with hydrogen peroxide at ambient and elevated temperatures, *J. Phys. Chem.*, 86, 1588–1590, 1982.
- Citri, O. and Epstein, I. R.: Mechanistic study of a coupled chemical oscillator: the bromate-chlorite-iodide reaction, *J. Phys. Chem.*, 92, 1865–1871, 1988.
- Clifton, C. L., Altstein, N., and Huie, R. E.: Rate constant for the reaction of NO<sub>2</sub> with sulfur(IV) over the pH range 5.3–13, *Environ. Sci. Technol.*, 22, 586–589, 1988.
- Damschen, D. E. and Martin, L. R.: Aqueous aerosol oxidation of nitrous acid by O<sub>2</sub>, O<sub>3</sub> and H<sub>2</sub>O<sub>2</sub>, *Atmos. Environ.*, 17, 2005–2011, 1983.

- Davis, Jr., W. and de Bruin, H. J.: New activity coefficients of 0-100 per cent aqueous nitric acid, *J. Inorg. Nucl. Chem.*, 26, 1069–1083, 1964.
- De Bruyn, W. J., Shorter, J. A., Davidovits, P., Worsnop, D. R., Zahniser, M. S., and Kolb, C. E.: Uptake of gas-phase sulfur species methanesulfonic acid, dimethylsulfoxide, and dimethyl sulfone by aqueous surfaces, *J. Geophys. Res.*, 99D, 16 927–16 932, 1994.
- Deister, U. and Warneck, P.: Photooxidation of  $\text{SO}_3^{2-}$  in aqueous solution, *J. Phys. Chem.*, 94, 2191–2198, 1990.
- DeMore, W. B., Sander, S. P., Golden, D. M., Hampson, R. F., Kurylo, M. J., Howard, C. J., Ravishankara, A. R., Kolb, C. E., and Molina, M. J.: Chemical kinetics and photochemical data for use in stratospheric modeling. Evaluation number 12, JPL Publication 97-4, Jet Propulsion Laboratory, Pasadena, CA, 1997.
- Dickson, A. G. and Millero, F. J.: A comparison of the equilibrium constants for the dissociation of carbonic acid in seawater media, *Deep-Sea Res. A*, 34, 1733–1743, 1987.
- Eigen, M. and Kustin, K.: The kinetics of halogen hydrolysis, *J. Am. Chem. Soc.*, 84, 1355–1361, 1962.
- Exner, M., Herrmann, H., and Zellner, R.: Laser-based studies of reactions of the nitrate radical in aqueous solution, *Ber. Bunsenges. Phys. Chem.*, 96, 470–477, 1992.
- Fogelman, K. D., Walker, D. M., and Margerum, D. W.: Non-metal redox kinetics: Hypochlorite and hypochlorous acid reactions with sulfite, *Inorg. Chem.*, 28, 986–993, 1989.
- Fortnum, D. H., Battaglia, C. J., Cohen, S. R., and Edwards, J. O.: The kinetics of the oxidation of halide ions by monosubstituted peroxides, *J. Am. Chem. Soc.*, 82, 778–782, 1960.
- Furrow, S.: Reactions of iodine intermediates in iodate-hydrogen peroxide oscillators, *J. Phys. Chem.*, 91, 2129–2135, 1987.
- Haag, W. R. and Hoigné, J.: Ozonation of bromide-containing waters: Kinetics of formation of hypobromous acid and bromate, *Environ. Sci. Technol.*, 17, 261–267, 1983.
- Hanson, D. R., Burkholder, J. B., Howard, C. J., and Ravishankara, A. R.: Measurement of OH and  $\text{HO}_2$  radical uptake coefficients on water and sulfuric acid surfaces, *J. Phys. Chem.*, 96, 4979–4985, 1992.
- Herrmann, H., Reese, A., and Zellner, R.: Time resolved UV/VIS diode array absorption spectroscopy of  $\text{SO}_x^-$  ( $x=3, 4, 5$ ) radical anions in aqueous solution, *J. Mol. Struct.*, 348, 183–186, 1995.
- Herrmann, H., Ervens, B., Nowacki, P., Wolke, R., and Zellner, R.: A chemical aqueous phase radical mechanism for tropospheric chemistry, *Chemosphere*, 38, 1223–1232, 1999.
- Hoffmann, M. R.: On the kinetics and mechanism of oxidation of aquated sulfur dioxide by ozone, *Atmos. Environ.*, 20, 1145–1154, 1986.
- Hoigné, J., Bader, H., Haag, W. R., and Staehelin, J.: Rate constants of reactions of ozone with organic and inorganic compounds in water – III Inorganic compounds and radicals, *Wat. Res.*, 19, 993–1004, 1985.
- Hu, J. H., Shi, Q., Davidovits, P., Worsnop, D. R., Zahniser, M. S., and Kolb, C. E.: Reactive uptake of  $\text{Cl}_2(\text{g})$  and  $\text{Br}_2(\text{g})$  by aqueous surfaces as a function of  $\text{Br}^-$  and  $\text{I}^-$  ion concentration: The effect of chemical reaction at the interface, *J. Phys. Chem.*, 99, 8768–8776, 1995.
- Huie, R. E. and Neta, P.: Rate constants for some oxidations of S(IV) by radicals in aqueous solutions, *Atmos. Environ.*, 21, 1743–1747, 1987.
- Huthwelker, T., Clegg, S. L., Peter, T., Carslaw, K., Luo, B. P., and Brimblecombe, P.: Solubility of HOCl in water and aqueous  $\text{H}_2\text{SO}_4$  to stratospheric temperatures, *J. Atmos. Chem.*, 21, 81–95, 1995.
- Jacob, D. J.: Chemistry of OH in remote clouds and its role in the production of formic acid and peroxy-monosulfate, *J. Geophys. Res.*, 91D, 9807–9826, 1986.
- Jacobi, H.-W.: Kinetische Untersuchungen und Modellrechnungen zur troposphärischen Chemie von Radikalanionen und Ozon in wässriger Phase, Ph.D. thesis, Universität GH Essen, Germany, 1996.
- Jacobi, H.-W., Herrmann, H., and Zellner, R.: Kinetic investigation of the  $\text{Cl}_2^-$  radical in the aqueous phase, in: *Air Pollution Research Report 57: Homogenous and heterogenous chemical Processes in the Troposphere*, edited by Mirabel, P., pp. 172–176, Office for official Publications of the European Communities, Luxembourg, 1996.
- Jacobi, H.-W., Wicktor, F., Herrmann, H., and Zellner, R.: A laser flash photolysis kinetic study of reactions of the  $\text{Cl}_2^-$  radical anion with oxygenated hydrocarbons in aqueous solution, *Int. J. Chem. Kinetics*, 31, 169–181, 1999.
- Jayne, J. T., Duan, S. X., Davidovits, P., Worsnop, D. R., Zahniser, M. S., and Kolb, C. E.: Uptake of gas-phase alcohol and organic acid molecules by water surfaces, *J. Phys. Chem.*, 95, 6329–6336, 1991.



- Jayson, G. G., Parsons, B. J., and Swallow, A. J.: Some simple, highly reactive, inorganic chlorine derivatives in aqueous solution, *J. Chem. Soc. Faraday Trans. 1*, 69, 1597–1607, 1973.
- Jiang, P.-Y., Katsumura, Y., Nagaishi, R., Domae, M., Ishikawa, K., Ishigure, K., and Yoshida, Y.: Pulse radiolysis study of concentrated sulfuric acid solutions. Formation mechanism, yield and reactivity of sulfate radicals, *J. Chem. Soc. Faraday Trans.*, 88, 1653–1658, 1992.
- Keller-Rudek, H., Koschel, D., Merlet, P., Ohms-Bredemann, U., Wagner, J., and Wietelmann, A.: *Gmelin Handbook of Inorganic and Organometallic Chemistry*, 8th Edition, Br, Bromine, Supplement Volume B2, Compounds with Oxygen and Nitrogen, Springer Verlag, Berlin, 1992.
- Kelley, C. M. and Tartar, H. V.: On the system: bromine-water, *J. Am. Chem. Soc.*, 78, 5752–5756, 1956.
- Kumar, K. and Margerum, D. W.: Kinetics and mechanism of general-acid-assisted oxidation of bromide by hypochlorite and hypochlorous acid, *Inorg. Chem.*, 26, 2706–2711, 1987.
- Lax, E.: *Taschenbuch für Chemiker und Physiker*, Springer Verlag, Berlin, 1969.
- Lee, Y.-N. and Schwartz, S. E.: Reaction kinetics of nitrogen dioxide with liquid water at low partial pressure, *J. Phys. Chem.*, 85, 840–848, 1981.
- Lengyel, I., Li, J., Kustin, K., and Epstein, I. R.: Rate constants for reactions between iodine- and chlorine-containing species: A detailed mechanism of the chlorine dioxine/chlorite reaction, *J. Am. Chem. Soc.*, 118, 3708–3719, 1996.
- Lind, J. A. and Kok, G. L.: Correction to “Henry’s law determinations for aqueous solutions of hydrogen peroxide, methylhydroperoxide, and peroxyacetic acid” by John A. Lind and Gregory L. Kok, *J. Geophys. Res.*, 99D, 21 119, 1994.
- Lind, J. A., Lazrus, A. L., and Kok, G. L.: Aqueous phase oxidation of sulfur(IV) by hydrogen peroxide, methylhydroperoxide, and peroxyacetic acid, *J. Geophys. Res.*, 92D, 4171–4177, 1987.
- Liu, Q. and Margerum, D. W.: Equilibrium and kinetics of bromine chloride hydrolysis, *Environ. Sci. Technol.*, 35, 1127–1133, 2001.
- Liu, Y., Pimentel, A. S., Antoku, Y., Giles, B. J., and Barker, J. R.: Temperature-dependent rate and equilibrium constants for  $\text{Br} \cdot (\text{aq}) + \text{Br}^- (\text{aq}) \rightleftharpoons \text{Br}_2^- \cdot (\text{aq})$ , *J. Phys. Chem. A*, 106, 11075–11082, 2002.
- Logager, T., Sehested, K., and Holcman, J.: Rate constants of the equilibrium reactions  $\text{SO}_4 + \text{HNO}_3 \rightleftharpoons \text{HSO}_4^- + \text{NO}_3$  and  $\text{SO}_4 + \text{NO}_3 \rightleftharpoons \text{SO}_4^{2-} + \text{NO}_3$ , *Radiat. Phys. Chem.*, 41, 539–543, 1993.
- Long, C. A. and Bielski, B. H. J.: Rate of reaction of superoxide radical with chloride-containing species, *J. Phys. Chem.*, 84, 555–557, 1980.
- Magi, L., Schweitzer, F., Pallares, C., Cherif, S., , Mirabel, P., and George, C.: Investigation of the uptake rate of ozone and methyl hydroperoxide by water surfaces, *J. Phys. Chem. A*, 101, 4943–4949, 1997.
- Marsh, A. R. W. and McElroy, W. J.: The dissociation constant and Henry’s law constant of HCl in aqueous solution, *Atmos. Environ.*, 19, 1075–1080, 1985.
- Martin, L. R. and Damschen, D. E.: Aqueous oxidation of sulfur dioxide by hydrogen peroxide at low pH, *Atmos. Environ.*, 15, 1615–1621, 1981.
- Matthew, B. M., George, I., and Anastasio, C.: Hydroperoxyl radical ( $\text{HO}_2 \cdot$ ) oxidizes dibromide radical anion ( $\cdot\text{Br}_2^-$ ) to bromine ( $\text{Br}_2$ ) in aqueous solution: Implications for the formation of  $\text{Br}_2$  in the marine boundary layer, *Geophys. Res. Lett.*, 30, doi: 10.1029/2003GL018572, 2003.
- Nagy, J. C., Kumar, K., and Margerum, D. W.: Non-metal redox kinetics: Oxidation of iodide by hypochlorous acid and by nitrogen trichloride measured by the pulsed-accelerated-flow method, *Inorg. Chem.*, 27, 2773–2780, 1988.
- Neta, P. and Huie, R. E.: Rate constants for reactions of  $\text{NO}_3$  radicals in aqueous solutions, *J. Phys. Chem.*, 90, 4644–4648, 1986.
- Olsen, R. J. and Epstein, I. R.: Bifurcation analysis of chemical reaction mechanisms. I. Steady state bifurcation structure, *J. Chem. Phys.*, 94, 3083–3095, 1991.
- Palmer, D. A., Ramette, R. W., and Mesmer, R. E.: The hydrolysis of iodine: Equilibria at high temperatures, *J. Nucl. Mater.*, 130, 280–286, 1985.
- Ponche, J. L., George, C., and Mirabel, P.: Mass transfer at the air/water interface: Mass accommodation coefficients of  $\text{SO}_2$ ,  $\text{HNO}_3$ ,  $\text{NO}_2$  and  $\text{NH}_3$ , *J. Atmos. Chem.*, 16, 1–21, 1993.
- Pöschl, U., Canagaratna, M., Jayne, J. T., Molina, L. T., Worsnop, D. R., Kolb, C. E., and Molina, M. J.: Mass accommodation coefficient of  $\text{H}_2\text{SO}_4$  vapor on aqueous sulfuric acid surfaces and gaseous diffusion coefficient of  $\text{H}_2\text{SO}_4$  in  $\text{N}_2/\text{H}_2\text{O}$ , *J. Phys. Chem. A*, 102, 10082–10089, 1998.

- Régimbal, J.-M. and Mozurkewich, M.: Peroxynitric acid decay mechanisms and kinetics at low pH, *J. Phys. Chem. A*, 101, 8822–8829, 1997.
- Ross, A. B., Mallard, W. G., Helman, W. P., Bielski, B. H. J., Buxton, G. V., Cabelli, D. E., Greenstock, C. L., Huie, R. E., and Neta, P.: NDRL-NIST Solution Kinetics Database: - Ver. 1, National Institute of Standards and Technology, Gaithersburg, MD, 1992.
- Rudich, Y., Talukdar, R. K., Imamura, T., Fox, R. W., and Ravishankara, A. R.: Uptake of  $\text{NO}_3$  on KI solutions: Rate coefficient for the  $\text{NO}_3 + \text{I}^-$  reaction and gas-phase diffusion coefficients for  $\text{NO}_3$ , *Chem. Phys. Lett.*, 261, 467–473, 1996.
- Schwartz, S. E. and White, W. H.: Solubility equilibria of the nitrogen oxides and oxyacids in dilute aqueous solution, in: *Advances in Environmental Science and Engineering*, edited by Pfafflin, J. R. and Ziegler, E. N., vol. 4, pp. 1–45, Gordon and Breach Science Publishers, NY, 1981.
- Schwarz, H. A. and Bielski, B. H. J.: Reactions of  $\text{HO}_2$  and  $\text{O}_2^-$  with iodine and bromine and the  $\text{I}_2^-$  and  $\text{I}$  atom reduction potentials, *J. Phys. Chem.*, 90, 1445–1448, 1986.
- Schweitzer, F., Mirabel, P., and George, C.: Uptake of hydrogen halides by water droplets, *J. Phys. Chem. A*, 104, 72–76, 2000.
- Sehested, K., Rasmussen, O. L., and Fricke, H.: Rate constants of OH with  $\text{HO}_2$ ,  $\text{O}_2^-$ , and  $\text{H}_2\text{O}_2^+$  from hydrogen peroxide formation in pulse-irradiated oxygenated water, *J. Phys. Chem.*, 72, 626–631, 1968.
- Sehested, K., Holcman, J., and Hart, E. J.: Rate constants and products of the reactions of  $\text{e}_{\text{aq}}^-$ ,  $\text{O}_2^-$  and H with ozone in aqueous solutions, *J. Phys. Chem.*, 87, 1951–1954, 1983.
- Seinfeld, J. H. and Pandis, S. N.: *Atmospheric Chemistry and Physics*, John Wiley & Sons, Inc., 1998.
- Shoute, L. C. T., Alfassi, Z. B., Neta, P., and Huie, R. E.: Temperature dependence of the rate constants for reaction of dihalide and azide radicals with inorganic reductants, *J. Phys. Chem.*, 95, 3238–3242, 1991.
- Sutton, H. C. and Downes, M. T.: Reactions of the  $\text{HO}_2$  radical in aqueous solution with bromine and related compounds, *J. Chem. Soc. Faraday Trans. 1*, 68, 1498–1507, 1972.
- Takami, A., Kato, S., Shimono, A., and Koda, S.: Uptake coefficient of OH radical on aqueous surface, *Chem. Phys.*, 231, 215–227, 1998.
- Thomas, K., Volz-Thomas, A., and Kley, D.: Zur Wechselwirkung von  $\text{NO}_3$ -Radikalen mit wässrigen Lösungen: Bestimmung des Henry- und des Massennakkomodationskoeffizienten, Ph.D. thesis, Institut für Chemie und Dynamik der Geosphäre 2, Forschungszentrum Jülich GmbH, Germany, 1993.
- Troy, R. C. and Margerum, D. W.: Non-metal redox kinetics: Hypobromite and hypobromous acid reactions with iodide and with sulfite and the hydrolysis of bromosulfate, *Inorg. Chem.*, 30, 3538–3543, 1991.
- Troy, R. C., Kelley, M. D., Nagy, J. C., and Margerum, D. W.: Non-metal redox kinetics: Iodine monobromide reaction with iodide ion and the hydrolysis of  $\text{IBr}$ , *Inorg. Chem.*, 30, 4838–4845, 1991.
- Vogt, R., Crutzen, P. J., and Sander, R.: A mechanism for halogen release from sea-salt aerosol in the remote marine boundary layer, *Nature*, 383, 327–330, 1996.
- Wagman, D. D., Evans, W. H., Parker, V. B., Schumm, R. H., Halow, I., Bailey, S. M., Churney, K. L., and Nuttall, R. L.: The NBS tables of chemical thermodynamic properties; Selected values for inorganic and  $\text{C}_1$  and  $\text{C}_2$  organic substances in SI units, *J. Phys. Chem. Ref. Data*, 11, suppl. 2, 1982.
- Wagner, I. and Strehlow, H.: On the flash photolysis of bromide ions in aqueous solution, *Ber. Bunsenges. Phys. Chem.*, 91, 1317–1321, 1987.
- Wang, T. X. and Margerum, D. W.: Kinetics of reversible chlorine hydrolysis: Temperature dependence and general-acid/base-assisted mechanisms, *Inorg. Chem.*, 33, 1050–1055, 1994.
- Wang, T. X., Kelley, M. D., Cooper, J. N., Beckwith, R. C., and Margerum, D. W.: Equilibrium, kinetic, and UV-spectral characteristics of aqueous bromine chloride, bromine, and chlorine species, *Inorg. Chem.*, 33, 5872–5878, 1994.
- Wang, Y. L., Nagy, J. C., and Margerum, D. W.: Kinetics of hydrolysis of iodine monochloride measured by the pulsed-accelerated-flow method, *J. Am. Chem. Soc.*, 111, 7838–7844, 1989.
- Warneck, P.: Chemical reactions in clouds, *Fresenius J. Anal. Chem.*, 340, 585–590, 1991.
- Warneck, P.: The relative importance of various pathways for the oxidation of sulfur dioxide and nitrogen dioxide in sunlit continental fair weather clouds, *Phys. Chem. Chem. Phys.*, 1, 5471–5483, 1999.
- Weast, R. C., ed.: *CRC Handbook of Chemistry and Physics*, 61st Edition, CRC Press, Inc., Boca Raton, FL, 1980.

- Weinstein-Lloyd, J. and Schwartz, S. E.: Low-intensity radiolysis study of free-radical reactions in cloudwater:  $\text{H}_2\text{O}_2$  production and destruction, *Environ. Sci. Technol.*, 25, 791–800, 1991.
- Wilhelm, E., Battino, R., and Wilcock, R. J.: Low-pressure solubility of gases in liquid water, *Chem. Rev.*, 77, 219–262, 1977.
- Wine, P. H., Tang, Y., Thorn, R. P., Wells, J. R., and Davis, D. D.: Kinetics of aqueous phase reactions of the  $\text{SO}_4^-$  radical with potential importance in cloud chemistry, *J. Geophys. Res.*, 94D, 1085–1094, 1989.
- Wingenter, O. W., Sive, B. C., Blake, N. J., and Rowland, F. S.: Atomic chlorine concentrations determined from ethane and hydroxyl measurements made over the Central Pacific Ocean, *Eos, Trans. AGU (Abstract Supplement)*, 80/46, F149–F150, 1999.
- Worsnop, D. R., Zahniser, M. S., Kolb, C. E., Gardner, J. A., Watson, L. R., van Doren, J. M., Jayne, J. T., and Davidovits, P.: The temperature dependence of mass accommodation of  $\text{SO}_2$  and  $\text{H}_2\text{O}_2$  on aqueous surfaces, *J. Phys. Chem.*, 93, 1159–1172, 1989.
- Wu, D., Wong, D., and Di Bartolo, B.: Evolution of  $\text{Cl}_2^-$  in aqueous NaCl solutions, *J. Photochem.*, 14, 303–310, 1980.
- Zehavi, D. and Rabani, J.: The oxidation of aqueous bromide by hydroxyl radicals. A pulse radiolytic investigation, *J. Phys. Chem.*, 76, 312–319, 1972.
